# Supplementary figures and images for: Allantoin ameliorates dopaminergic neuronal damage in MPTP-induced Parkinson's disease mice via regulating oxidative damage, inflammation, and gut microbiota disorder
Source: Royal Society of Chemistry journal article supplement (doi:10.1039/d4fo02167c), 2024-01-01

S1

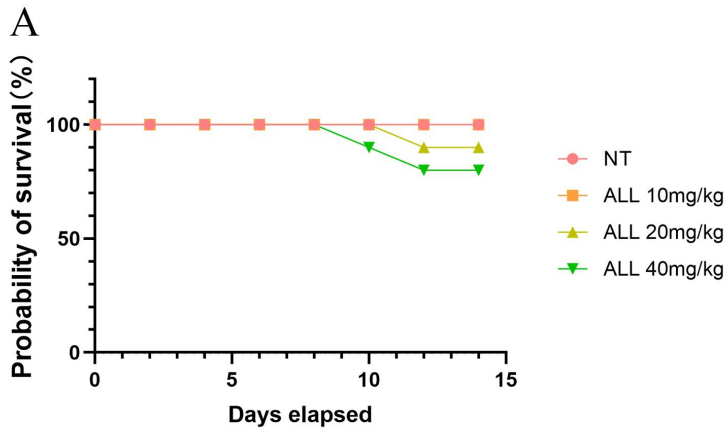

Supplement: d4fo02167c3.pdf [file d4fo02167c3.pdf]

S2  
A

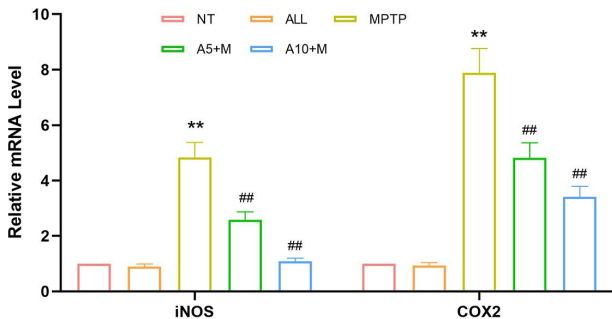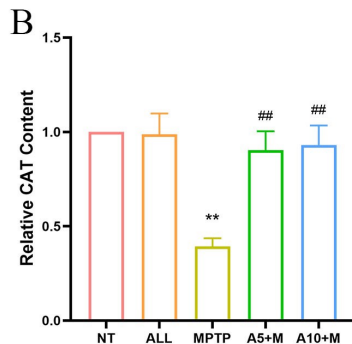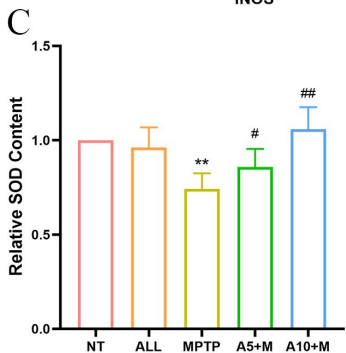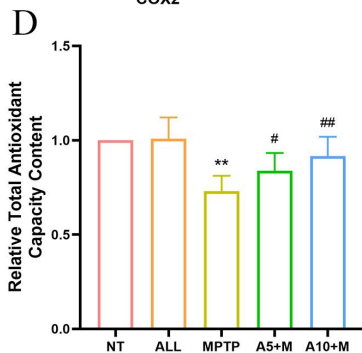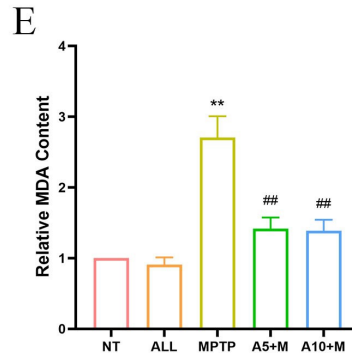

Supplement: d4fo02167c4.pdf [file d4fo02167c4.pdf]

S3

A

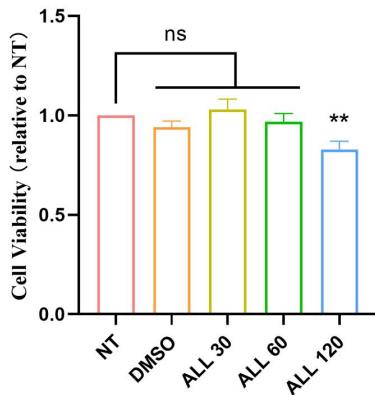

B

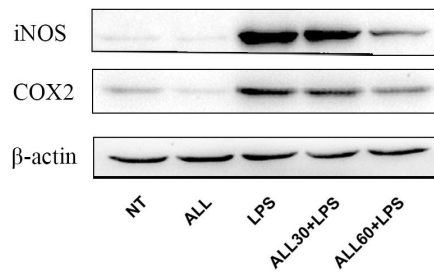

C

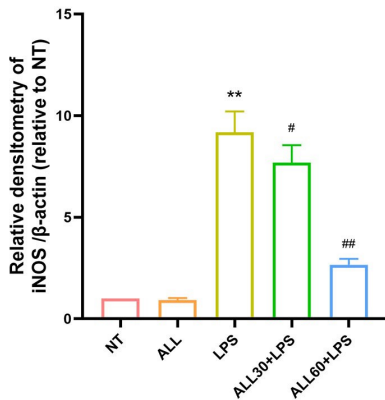

D

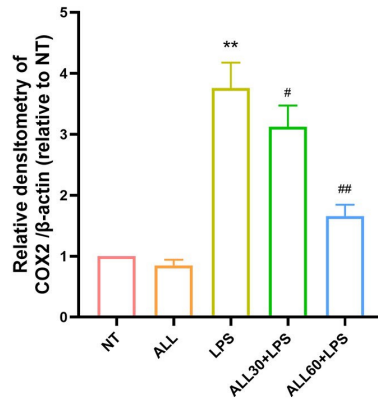

Supplement: d4fo02167c5.pdf [file d4fo02167c5.pdf]

S4

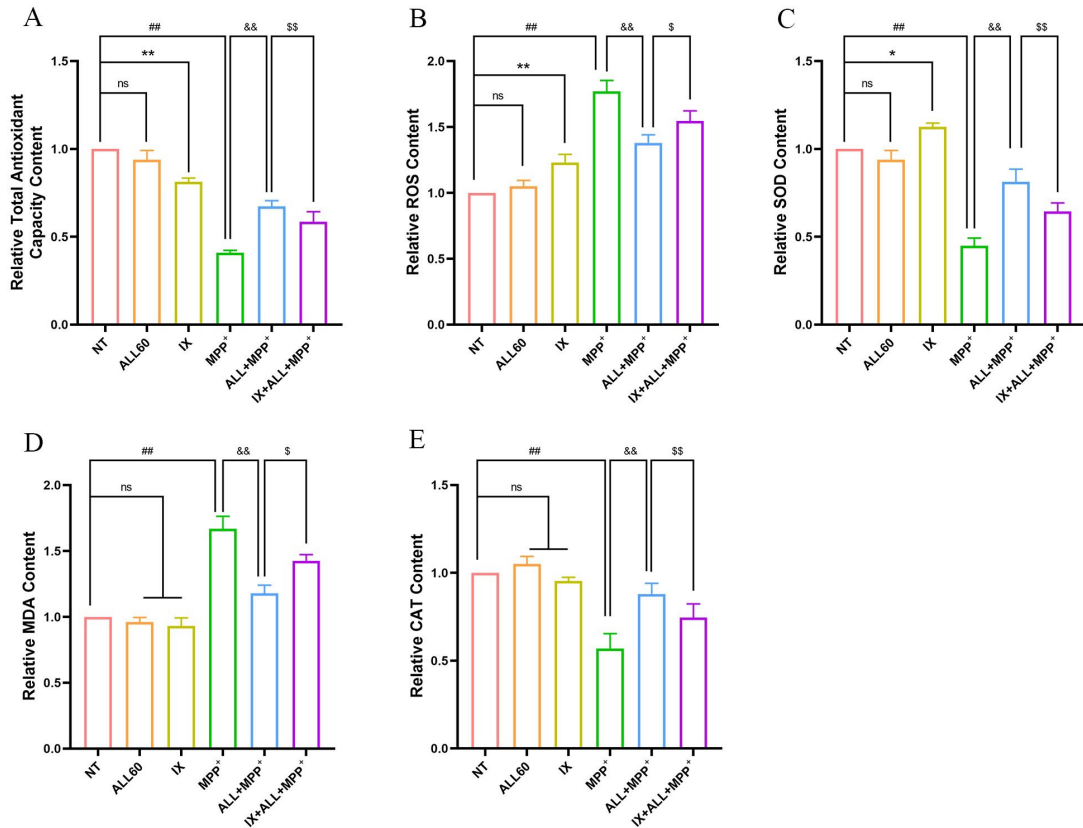

Supplement: d4fo02167c6.pdf [file d4fo02167c6.pdf]

S5

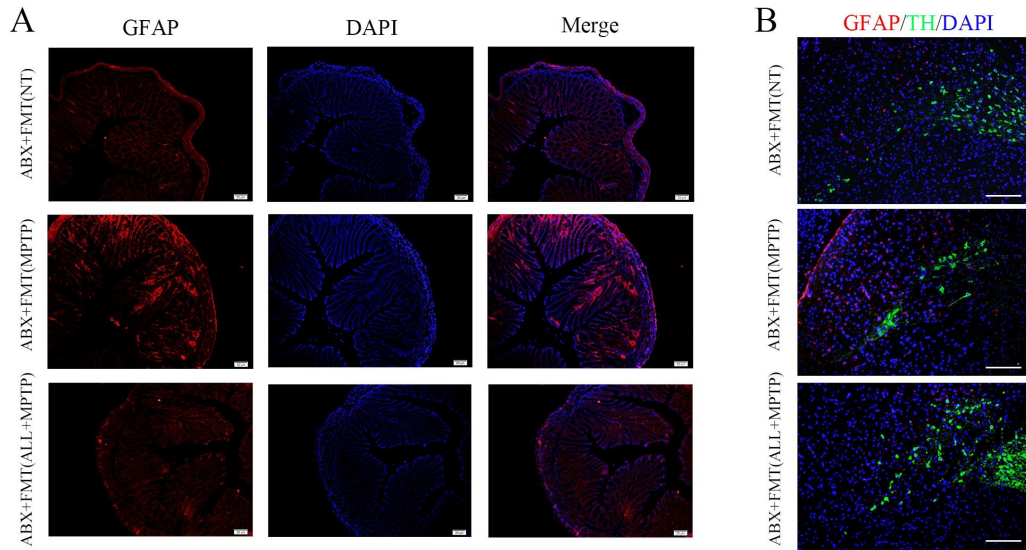

Supplement: d4fo02167c7.pdf [file d4fo02167c7.pdf]
